# Supplementary material
Source: MDPI journal article supplement (https://www.mdpi.com/1424-2818/13/4/145)
Supplement: s1 [file s1]

I. Survey for the participating communities

Interviewer: \_\_\_\_\_ Date: \_\_\_\_\_ Household ID#: \_\_\_\_\_ Age: \_\_\_\_\_

Sex: \_\_\_\_\_ Occupation: \_\_\_\_\_ Location: \_\_\_\_\_

1. Can you tell me about your experience living near KNP?
  - a. Any benefits?
  - b. Any problems?
2. Do you experience crop raiding by animals in the Park? Yes / No
  - a. If Yes, which species?
  - b. In the last harvest season, how many times did animals from the Park crop raid in your garden? What percent of crop yield was lost?  
\_\_\_\_\_ % of crop yield was lost
3. Have you noticed a change in incidences of crop raiding since joining C2C (more often, less often, no change, other)?
  - a. What types of changes have you seen?
  - b. Have there been changes in crop raiding by specific species?
  - c. What do you think is the cause of these changes?

4. Below is a list of animals commonly found in KNP. How would you describe your feelings about each species?

| Species                 | Describe your feelings about the listed species |
|-------------------------|-------------------------------------------------|
| Elephants               |                                                 |
| Baboons                 |                                                 |
| Chimpanzees             |                                                 |
| Black and White Colobus |                                                 |
| Red Colobus             |                                                 |
| Vervet Monkeys          |                                                 |

5. How do you feel about protecting the environment?
6. How has C2C been of importance to conservation?
7. How do you feel about KNP since joining C2C?
8. What is your current attitude toward UWA? (Neg, Pos, Neutral, Other)? Why?
9. What do you think is the attitude of the community toward UWA (Neg, Pos, Neutral, Other)? Why?
10. Has your attitude toward UWA changed since joining C2C?
11. Is there anything else you would like the project to know or consider? Any additional comments or questions?

## II. Survey for community 4

Interviewer: \_\_\_\_\_ Date: \_\_\_\_\_ Household ID#: \_\_\_\_\_ Age: \_\_\_\_\_

Sex: \_\_\_\_\_ Occupation: \_\_\_\_\_ Location: \_\_\_\_\_

1. Can you tell me about your experience living near KNP?
  - a. Any benefits?
  - b. Any problems?
2. Do you experience crop raiding by animals in the Park? Yes / No
  - a. If Yes, which species?
  - b. In the last harvest season, how many times did animals from the Park crop raid in your garden? What percent of crop yield was lost?  
 \_\_\_\_\_ % of crop yield was lost
3. Have you noticed a change in incidences of crop raiding this past year as compared to previous years (more often, less often, no change, other)?
  - a. What types of changes have you seen?
  - b. Have there been changes in crop raiding by specific species?
  - c. What do you think is the cause of these changes?

4. Below is a list of animals commonly found in KNP. How would you describe your feelings about each species?

| Species                 | Describe your feelings about the listed species |
|-------------------------|-------------------------------------------------|
| Elephants               |                                                 |
| Baboons                 |                                                 |
| Chimpanzees             |                                                 |
| Black and White Colobus |                                                 |
| Red Colobus             |                                                 |
| Vervet Monkeys          |                                                 |

5. How do you feel about KNP?
6. How do you feel about protecting the environment?
7. What is your current attitude toward UWA? (Neg, Pos, Neutral, Other)? Why?
8. What do you think is the attitude of the community toward UWA (Neg, Pos, Neutral, Other)? Why?
9. Any additional comments or questions?
